# Supplementary material for: Accelerated aortic 4D flow cardiovascular magnetic resonance using compressed sensing: applicability, validation and clinical integration
Source: PubMed Central journal article supplement (PMC6802342; doi:10.1186/s12968-019-0573-0), 2019-10-21

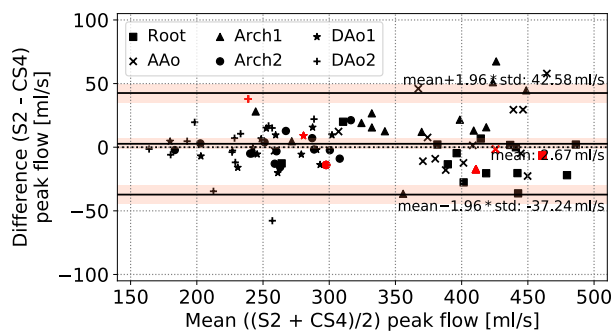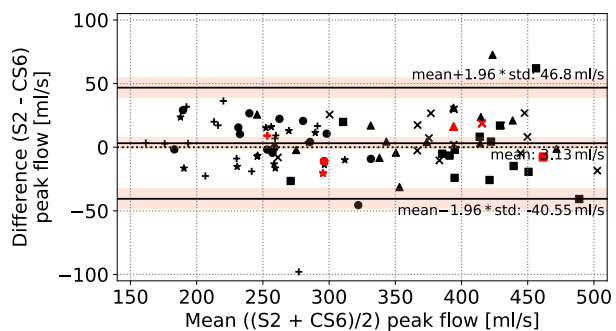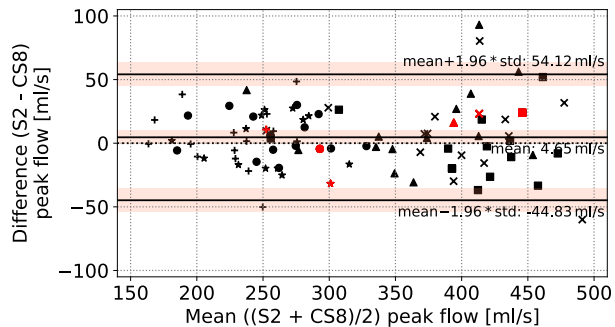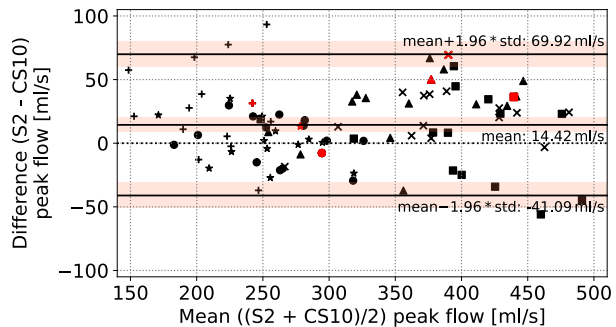

Supplement: 12968_2019_573_MOESM1_ESM.pdf [file 12968_2019_573_MOESM1_ESM.pdf]
