# Supplementary material for: Accelerated aortic 4D flow cardiovascular magnetic resonance using compressed sensing: applicability, validation and clinical integration
Source: PubMed Central journal article supplement (PMC6802342; doi:10.1186/s12968-019-0573-0), 2019-10-21

# 1. Interobserver Variability

## a. Bland-Altman plots for net flows

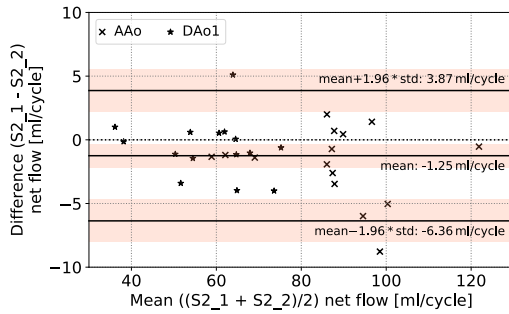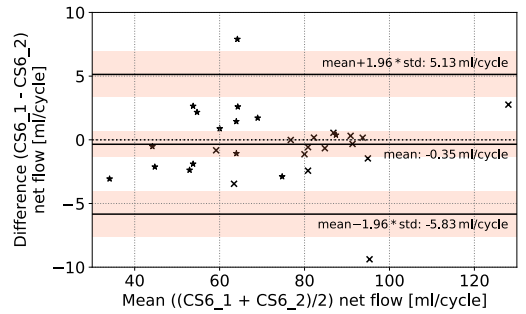

## b. Bland-Altman plots for peak flows

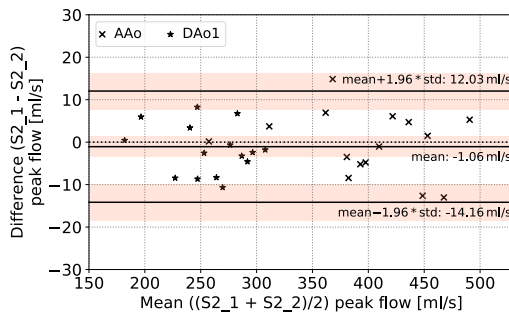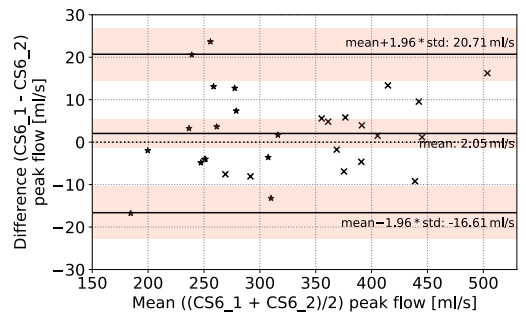

# 2. Intraobserver Variability

## a. Bland-Altman plots for net flows

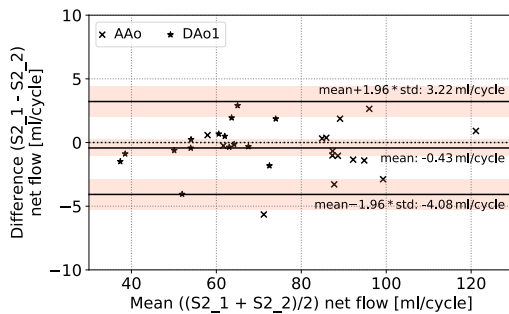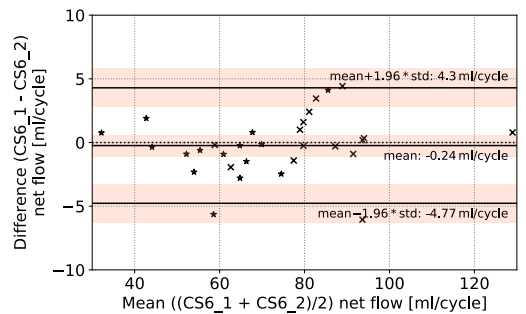

## b. Bland-Altman plots for peak flows

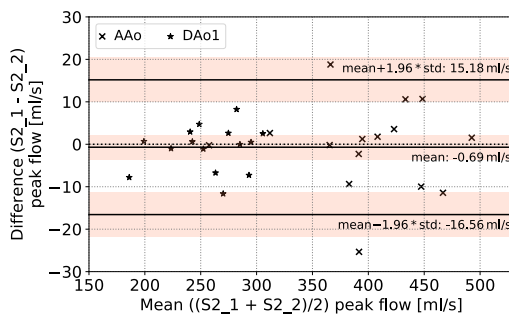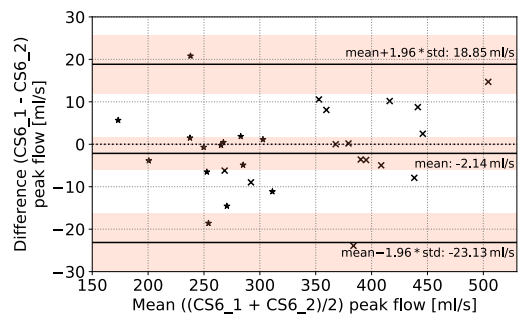

Supplement: 12968_2019_573_MOESM3_ESM.pdf [file 12968_2019_573_MOESM3_ESM.pdf]
